# Supplementary material
Source: PubMed Central journal article supplement (PMC1065685)
Supplement: pbio.0030079.st001.pdf [file pbio.0030079.st001.pdf]

Supplementary Table 1. **INTENTION minus ACTION. Local Maxima in Talairach coordinates. Only the six local maxima with highest Z score in each cluster are provided in the Table. Cluster size is in voxels. In all these Tables, when the cluster encompasses more than one anatomical location, the localization given corresponds to the local maxima with the highest Z score.**

| Localization               | Cluster size | Z    | x   | y   | z   |
|----------------------------|--------------|------|-----|-----|-----|
| Calcarine/Occipital Cortex | 8470         | 5.76 | 16  | -92 | 0   |
|                            |              | 5.54 | 14  | -88 | -16 |
|                            |              | 5.53 | 10  | -82 | -18 |
|                            |              | 5.48 | 28  | -80 | -22 |
|                            |              | 5.32 | -10 | -88 | -14 |
|                            |              | 5.3  | 10  | -92 | 0   |
| Medial Parietal/Precuneus  | 1357         | 3.89 | 4   | -66 | 52  |
|                            |              | 3.86 | 4   | -70 | 40  |
|                            |              | 3.86 | -2  | -58 | 52  |
|                            |              | 3.74 | 2   | -56 | 60  |
|                            |              | 3.55 | -4  | -54 | 42  |
|                            |              | 3.52 | 10  | -58 | 50  |
| Inferior Frontal Gyrus     | 581          | 3.86 | 46  | 20  | 22  |
|                            |              | 3.58 | 44  | 10  | 34  |
|                            |              | 3.51 | 58  | 28  | 14  |
|                            |              | 3.43 | 38  | 20  | 22  |
|                            |              | 3.42 | 56  | 22  | 22  |
|                            |              | 3.4  | 38  | 16  | 24  |
