# Supplementary material
Source: PubMed Central journal article supplement (PMC1065685)
Supplement: pbio.0030079.st002.pdf [file pbio.0030079.st002.pdf]

Supplementary Table 2. **INTENTION minus CONTEXT. Local Maxima in Talairach coordinates. Only the six local maxima with highest Z score in each cluster are provided in the Table. Cluster size is in voxels. TPO: Temporo-Parieto-Occipital. LH: left hemisphere. RH: right hemisphere.**

| Localization         | Cluster Size | Z    | x   | y   | z   |
|----------------------|--------------|------|-----|-----|-----|
| TPO junction         | 18053        | 6.04 | -34 | -46 | 48  |
|                      |              | 5.99 | -26 | -54 | 62  |
|                      |              | 5.79 | -50 | -66 | 0   |
|                      |              | 5.69 | 54  | -68 | -8  |
|                      |              | 5.61 | -28 | -42 | 52  |
|                      |              | 5.61 | -54 | -80 | 0   |
| Premotor cortex (RH) | 2935         | 4.85 | 48  | 8   | 44  |
|                      |              | 4.73 | 50  | 18  | 42  |
|                      |              | 4.41 | 38  | 18  | 34  |
|                      |              | 4.4  | 54  | 28  | 20  |
|                      |              | 4.31 | 22  | -6  | 62  |
|                      |              | 4.26 | 36  | 20  | 50  |
| Premotor cortex (LH) | 1408         | 4.53 | -28 | -2  | 68  |
|                      |              | 4.11 | -24 | -8  | 72  |
|                      |              | 4.06 | -34 | -8  | 50  |
|                      |              | 4.04 | -38 | -6  | 48  |
|                      |              | 3.61 | -24 | -10 | 54  |
|                      |              | 3.58 | -28 | -10 | 58  |
| OrbitoFrontal Cortex | 1095         | 4.3  | 34  | 48  | 6   |
|                      |              | 4.03 | 52  | 38  | -14 |
|                      |              | 3.94 | 48  | 42  | -16 |
|                      |              | 3.88 | 44  | 50  | -10 |
|                      |              | 3.84 | 48  | 50  | -10 |
|                      |              | 3.79 | 26  | 52  | 6   |
| Cerebellum (LH)      | 1025         | 4.51 | -28 | -50 | -40 |
|                      |              | 4.14 | -34 | -52 | -36 |
|                      |              | 4.14 | -18 | -70 | -36 |
|                      |              | 4.06 | -18 | -76 | -50 |
|                      |              | 4.05 | -38 | -54 | -36 |
|                      |              | 4.04 | -20 | -74 | -46 |
| Cerebellum (RH)      | 622          | 4.24 | 28  | -54 | -36 |
|                      |              | 4.04 | 36  | -44 | -38 |
|                      |              | 3.74 | 40  | -54 | -34 |
|                      |              | 3.55 | 46  | -56 | -38 |
|                      |              | 3.54 | 30  | -44 | -60 |
|                      |              | 3.53 | 36  | -56 | -34 |
