# Supplementary material
Source: PubMed Central journal article supplement (PMC1065685)
Supplement: pbio.0030079.st003.pdf [file pbio.0030079.st003.pdf]

**Supplementary Table 3. Effect of task instructions. Local maxima in Talairach coordinates. Explicit minus Implicit instruction, ACTION versus rest. Only the six local maxima with highest Z score in the only cluster surviving the statistical threshold are provided in the Table. Cluster size is in voxels. SMA: Supplementary motor area.**

| Localization | Cluster size | Z    | x  | y  | z  |
|--------------|--------------|------|----|----|----|
| Pre-SMA      | 576          | 4.22 | -6 | 14 | 52 |
|              |              | 4.08 | -2 | 16 | 62 |
|              |              | 3.65 | -6 | 18 | 46 |
|              |              | 3.63 | -2 | 20 | 52 |
|              |              | 3.4  | -6 | 24 | 48 |
|              |              | 3.32 | -6 | 4  | 54 |
