# Supplementary material
Source: PubMed Central journal article supplement (PMC1065685)
Supplement: pbio.0030079.st004.pdf [file pbio.0030079.st004.pdf]

**Supplementary Table 4. Effect of task instructions. Local maxima in Talairach coordinates. Explicit minus Implicit instruction, CONTEXT versus rest. Only the six local maxima with highest Z score in each cluster are provided in the Table. Cluster size is in voxels.**

| Localization                       | Cluster size | Z    | x   | y   | z   |
|------------------------------------|--------------|------|-----|-----|-----|
| Lateral and mesial premotor cortex | 2259         | 4.68 | -12 | 16  | 60  |
|                                    |              | 4.29 | -10 | 22  | 62  |
|                                    |              | 4.27 | -6  | 16  | 58  |
|                                    |              | 4.24 | -34 | -2  | 40  |
|                                    |              | 4.21 | -22 | 22  | 52  |
|                                    |              | 4.19 | -6  | 16  | 52  |
| Inferior Frontal Gyrus             | 1211         | 4.05 | -48 | 28  | -12 |
|                                    |              | 3.79 | -44 | 24  | 10  |
|                                    |              | 3.5  | -58 | 14  | 26  |
|                                    |              | 3.41 | -48 | 40  | -12 |
|                                    |              | 3.4  | -62 | 8   | 28  |
|                                    |              | 3.32 | -54 | 26  | -2  |
| Ventral Striatum                   | 453          | 3.85 | -18 | 6   | 2   |
|                                    |              | 3.83 | -16 | 12  | 4   |
|                                    |              | 3.6  | -24 | 4   | -8  |
|                                    |              | 3.56 | -22 | -8  | -2  |
|                                    |              | 3.38 | -30 | -14 | -16 |
|                                    |              | 3.04 | -26 | -10 | -8  |
