# Supplementary material
Source: PubMed Central journal article supplement (PMC1065685)
Supplement: pbio.0030079.st005.pdf [file pbio.0030079.st005.pdf]

Supplementary Table 5. **Effect of task instructions. Local maxima in Talairach coordinates. Explicit minus Implicit instruction, INTENTION versus rest. Only the six local maxima with highest Z score in each cluster are provided in the Table. Cluster size is in voxels. ACC: Anterior cingulate cortex. VLPFC: ventrolateral prefrontal cortex.**

| Localization | Cluster size | Z    | x   | y  | z  |
|--------------|--------------|------|-----|----|----|
| PreSMA/ACC   | 1002         | 4.11 | -8  | 26 | 46 |
|              |              | 3.97 | -2  | 14 | 62 |
|              |              | 3.55 | 14  | 30 | 30 |
|              |              | 3.55 | -4  | 16 | 52 |
|              |              | 3.51 | -8  | 24 | 62 |
|              |              | 3.42 | -6  | 30 | 36 |
| VLPFC        | 882          | 4.13 | -38 | 46 | 4  |
|              |              | 3.52 | -40 | 30 | 6  |
|              |              | 3.49 | -34 | 52 | 4  |
|              |              | 3.39 | -26 | 50 | 8  |
|              |              | 3.33 | -40 | 52 | -6 |
|              |              | 3.33 | -46 | 24 | 24 |
